# Supplementary material for: Emission ensemble approach to improve the development of multi-scale emission inventories
Source: Copernicus journal article supplement (doi:10.5194/gmd-17-3631-2024), 2024-05-07
Supplement: Supplementary file 1 [file gmd-17-3631-2024-supplement.pdf]

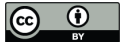

*Supplement of*

## **Emission ensemble approach to improve the development of multi-scale emission inventories**

**Philippe Thunis et al.**

*Correspondence to:* Philippe Thunis ([philippe.thunis@ec.europa.eu](mailto:philippe.thunis@ec.europa.eu))

The copyright of individual parts of the supplement might differ from the article licence.

1 Supplementary material

2

3 S1. EU-wide comparisons of CAMS and EMEP vs the ensemble

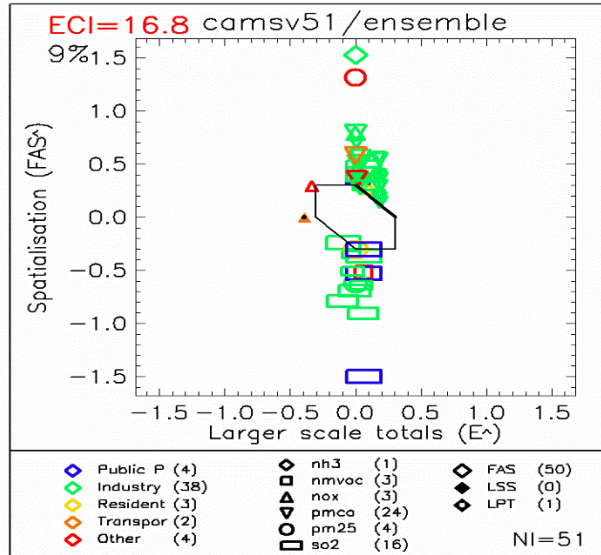

4

5 Figure S1: Diamond diagram that isolates the bilateral comparison between CAMS-REG and the ensemble. Symbols and colours  
 6 are as specified in the legend. Only inconsistencies are displayed. For visualization purposes, we limit the axis to a factor 2 in  
 7 terms of magnitude (from -2 to 2) and bound the ECI to 100 (e.g. values of ECI larger than 100 are plotted with a value of 2).  
 8 Numbers within bracket in the bottom legend are the total number of inconsistencies for a given pollutant, sector or type.

9 For CAMS-REG, the ECI (=16.8) indicates that the largest inconsistency is around a factor of 15  
 10 larger than the estimated level of uncertainty. About 9% of the relevant emission points show an  
 11 inconsistency larger than a factor 2. As indicated by the overview table, these 9% amount to 51  
 12 inconsistencies that are almost all related to urban share issues (50), mostly for PM<sub>co</sub> and SO<sub>2</sub>  
 13 from the industry sector.

14

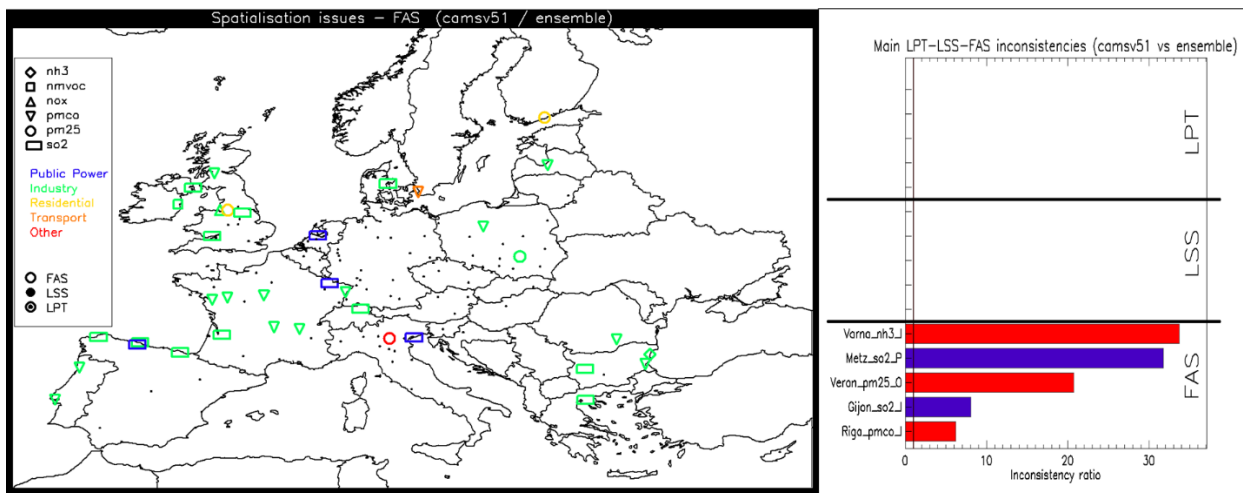

15

16 Figure S2: Left: Main inconsistencies spotted at urban scale for CAMS-REG when compared to the ensemble. Only the main  
 17 spatial inconsistency (FAS) for each city is plotted. See explanation of symbols on the top left of the figure. Right: Major LPT (top  
 18 5), LSS (middle 5) and FAS (lower 5) inconsistencies. The two first letters indicate the country code for LSS and LPT whereas the

19 4 first city letters are given for FAS. Red shading indicates an overestimation and blue shading an underestimation for the  
 20 EDGAR inventory.

21 Figure S2 points to the following main issues:

- 22
- 23 • All major inconsistencies are related to the choice of spatial distribution of the emissions  
 24 (FAS) and occur in particular in Varna for industrial NH<sub>3</sub>, in Metz for SO<sub>2</sub> from power plant  
 25 and in Verona for PM<sub>2.5</sub> from the other sector. These three inconsistencies exceed a factor  
 26 20. Note also that these inconsistencies are either over- or under-estimations (red and blue  
 27 color bars, respectively). In Bulgaria, the largest industrial point source in E-PRTR (68% of  
 28 the country total) is located near Varna, hence the high emissions there. The large differences  
 29 among inventories occur due to the proportion of these emissions being placed within the city  
 30 area (see Figure S8). The same explains the differences for SO<sub>2</sub> in Metz for the power plant  
 31 sector or for PM<sub>2.5</sub> in Verona for the other sector.
  - 32
  - 33 • Although of lower importance, inconsistencies are also spotted for industrial PM<sub>co</sub> emissions  
 34 in France and are systematic in several cities across the country. The same occur for  
 35 industrial SO<sub>2</sub> emissions in the UK and in Spain. The diamond plot shows that while PM<sub>co</sub>  
 36 has larger estimates in the CAMS-REG inventory, the opposite is true for SO<sub>2</sub>. A likely  
 37 explanation for the differences in SO<sub>2</sub> emissions is that their attribution to point sources is  
 38 done only for those included in point source reporting (E-PRTR). Smaller sources which are  
 39 below the threshold for E-PRTR reporting are distributed as diffuse sources to industrial  
 40 zones (land cover class). This may lead to over-allocation in some urban areas.

41

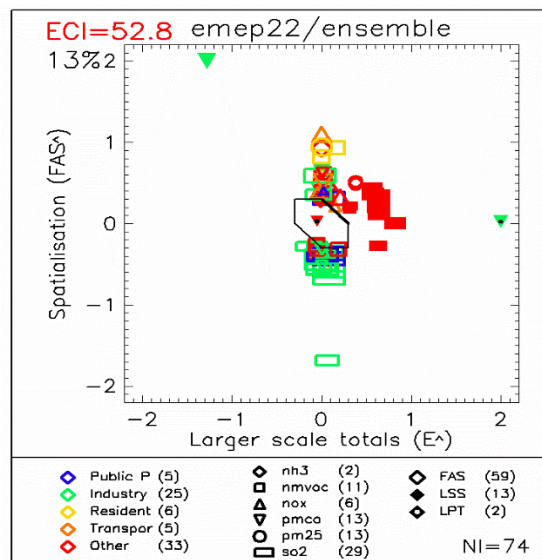

42

43

Figure S3: Same as Figure S1 but for EMEP

44 For EMEP, the ECI (52.8) indicates that the maximum inconsistency is about a factor 50 larger  
 45 than the estimated level of uncertainty. About 13% of the relevant emission points show an  
 46 inconsistency. As indicated by the overview table, these 13% amount to 74 inconsistencies that  
 47 are mostly related to the spatial distribution of the emissions (FAS=59), mostly for SO<sub>2</sub> (29), and

48 in a lesser extent to PM<sub>2.5</sub> (13), PM<sub>co</sub> (13) and NMVOC (11) originating from the other sector  
 49 (33), but also from the industry (25) sectors.  
 50

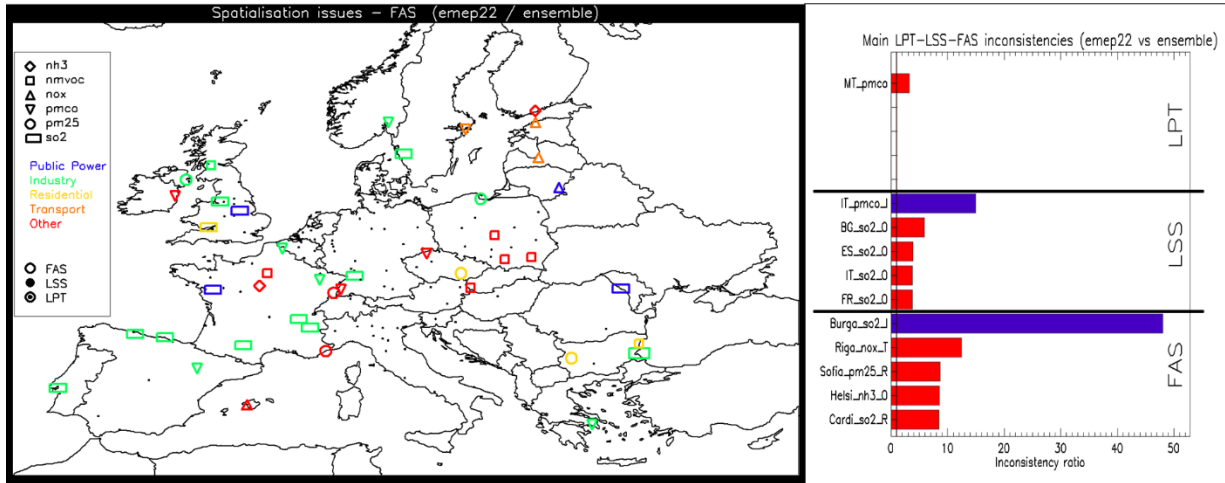

51  
 52 Figure S4: same as Error! Reference source not found. but for EMEP

53 Figure S4 points to the following main issues:

- 54
- 55 • One inconsistency only is spotted at country total level (LPT) for the PM<sub>co</sub> industrial  
 56 emissions in Malta (factor 3). Similarly to what is reported for EDGAR for Malta, the low-  
 57 emission filter is not efficient to remove these small (not relevant) emissions, given the small  
 58 size of the country
  - 59 • A series of inconsistencies are associated with the sectorial share at country level (LSS). The  
 60 largest is observed for PM<sub>co</sub> industrial emissions in Malta (factor >30) and add up to the  
 61 inconsistency at country total level previously highlighted. The same inconsistency, although  
 62 as underestimation (blue shaded bar in figure S4), occurs in Italy with a factor 15. LSS  
 63 inconsistencies also occur for SO<sub>2</sub> emissions from the other sector in countries like Bulgaria,  
 64 Spain and Italy (between a factor 3 and 6)
  - 65 • Regarding inconsistencies related to the spatial distribution of the emissions, one large one  
 66 (factor >50) is flagged in Burgas for SO<sub>2</sub> emissions from the industry sector (see Figure S9).  
 67 This type of inconsistencies also occur in a lesser measure in other cities and similarly to  
 68 CAMS-REG, are likely explained by the precision of their attribution as point sources.

69 Overall, inconsistencies associated with EMEP and CAMS-REG mostly appear for the other and  
 70 industry sectors, mainly pointing to issues related to spatial distribution, i.e. to urban activity  
 71 shares.

72

73 S2. Comparisons of EDGAR, CAMS and EMEP vs the ensemble over Poland

74

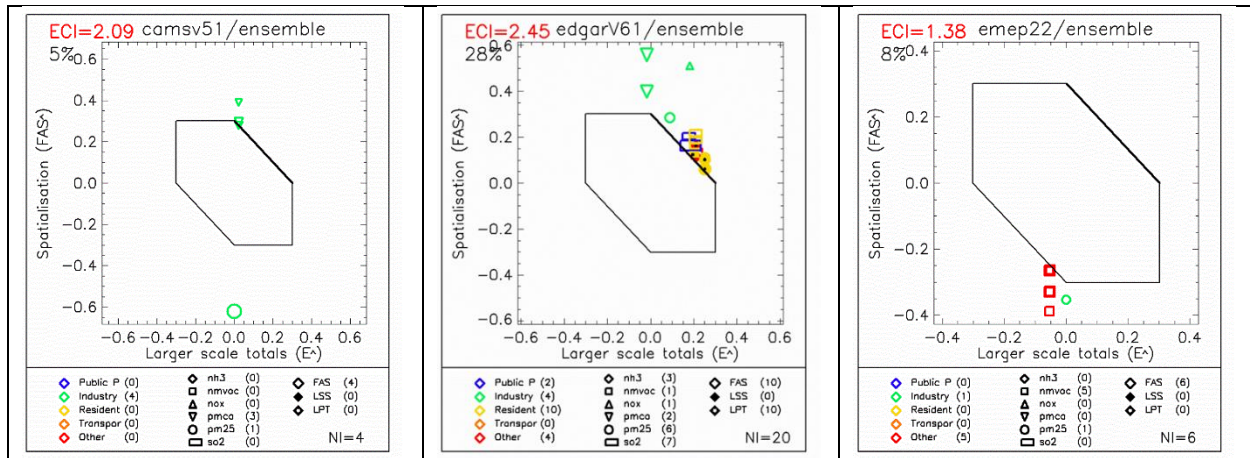

75 Figure S5: Overview diamonds. The diagrams show the comparison of the three ensemble components (CAMS-REG, EDGAR,  
76 EMEP) with the ensemble inventory over Poland. Symbols and colours are as specified in the legend. In all diagrams, only  
77 inconsistencies are displayed

78 For EMEP (right in Figures S5 and S6), inconsistencies are all related to the spatial distribution  
79 of the emissions (FAS) with factors slightly larger than 2 for the other sector NMVOC emissions  
80 in the cities of Krakow (Figure S5), Lodz and Rzeszow and for the PM2.5 industry emissions in  
81 Gdansk. Here again, the location of the main emission sources is similar with EDGAR and  
82 CAMS-REG, the EMEP estimates are significantly lower. In the case of NMVOC emissions,  
83 EMEP has higher values for all sectors, with the exception of residential combustion (GNFR C).  
84 The issue therefore originates from the sectorial share at country level.

85  
86 For EDGAR (middle in Figures S5 and S6), we find a comparable share between country and  
87 urban scale inconsistencies. These country inconsistencies appear because the sum of LPT and  
88 LSS is larger than the threshold of 2 while their individual values remain below this threshold.  
89 This is why no country scale issues appear in Figure S6. The largest (factor 3) urban scale issues  
90 (FAS) are identified for the industrial sector for PMco in Kielce and Czestochowa and for NOx  
91 in Krakow. Gridded data for PMco/Kielce (Figure S16) indicate that industrial locations are quite  
92 similar with those of EMEP and CAMS-REG but the emitted amounts are much larger. EDGAR  
93 also shows different values in the residential sector for PM2.5 at country level. Explanations for  
94 such differences are linked with the fact that no emissions are allocated to biomass technologies  
95 in EDGAR, and that emission factors for some fuels are very different. For example, the  
96 EDGAR emission factor for other bituminous fuel allocated to small boilers is nearly the double  
97 of the default values. On the other hand, the values reported for Poland (2020) for both coal and  
98 biomass emission factors are well below default values, increasing the difference with the  
99 EDGAR estimation. Note that these emission factors have been significantly revised in the  
100 Poland 2022 submission, which will be reflected in future EMEP and CAMS-REG inventories.

101  
102 Similar to EMEP, all inconsistencies in CAMS-REG (left in Figures S5 and S6) are related with  
103 the spatial distribution of emissions. The largest inconsistencies occur for industrial emissions of  
104 PM2.5 in Kielce (Figure S12) and of PMco in Bydgoszcz. In both cases, CAMS-REG distributes  
105 its emissions over more locations with a higher intensity.

106



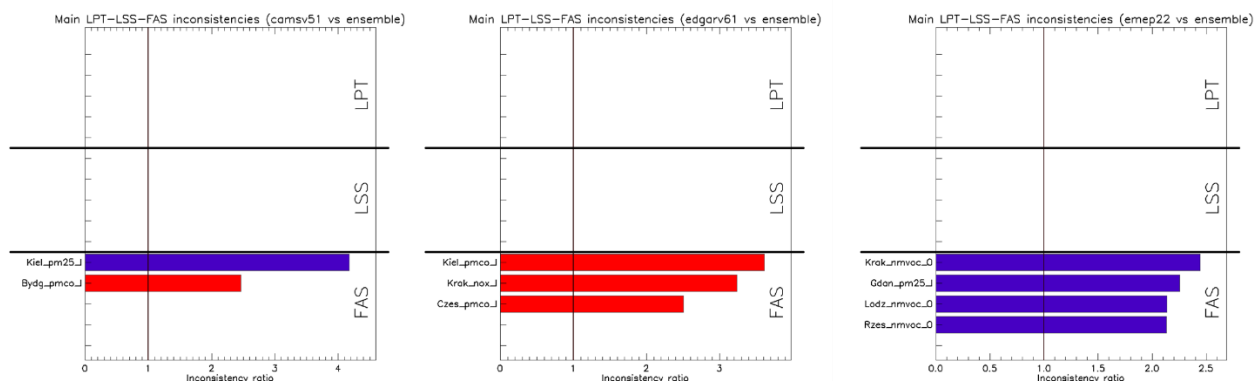

107  
108  
109  
110

Figure S6: Major inconsistencies (up to 5 per category) for LPT, LSS and FAS for CAMS-REG (left), EDGAR (middle) and EMEP (right). Red and blue shadings indicate an overestimation or underestimation of the individual inventory with respect to the ensemble, respectively.

111 Many possible reasons for differences between local and Europe-wide inventories exist. In the  
112 case of Poland, a possible source of inconsistencies is a consequence of how the Polish NB  
113 operates and under what rules. Any given “user of the environment” is obliged to report  
114 emissions caused by a specific industrial/chemical process for which his/hers “permit to use the  
115 environment” is issued. The pollutants and GHG list that must be reported to NB differs among  
116 chemical/industrial processes altering “users of environment” obligations. Emission from NB  
117 data is not taken into account by the Polish National Statistical Office directly and the primary  
118 source of Europe wide inventories activity data relies on national statistics. Furthermore, while  
119 the Polish EMEP reports are partially based on NB and partially on original methodology  
120 (additional emission values) causing disagreements with NB, CED directly adopts emission  
121 values reported to NB without additional changes. This issue will be further investigated among  
122 CED and Polish EMEP compilers.

123

124 Yet another issue is that in the case of specific installations registered in NB, reports might be  
125 based on direct stack measurements or actual condition of installations while the top-down  
126 approach accounts only for general resources/fuel consumption. The advantage of NB over top-  
127 down approaches is its sensitivity to temporal variability since reporting users are aware of any  
128 changes in fuel or other resources quality they consume, rapid changes in production volumes,  
129 new technologies used, newly mounted stack filters, etc. Those small changes might not be  
130 captured in full in bulk national statistics, commonly based on fuel sales. Finally, it must be  
131 commented that in the case of NB, the possible accidental “human factor” might be a source of  
132 additional errors since reports are done manually via the online system. Despite some automatic  
133 checking algorithms and manual expert evaluation, discrepancies are possible.

134

135 While EU-wide inventory compilers distribute country totals obtained from bulk national  
136 statistics, population density is often used as a spatial proxy. In this context, the resolution-free  
137 design of CED inventory might be a paradoxical limitation here since the exact geographical  
138 location of emission sources is prioritized, and some activities are very tough to allocate. For  
139 example, coating applications (2D3d) which are responsible for >63 Mg of NMVOC emissions  
140 (2018) in Poland, might be omitted in CED due to a lack of reliable spatial data in case they are  
141 not provided by NB users in full. Yet another issue is that this pollutant is not being

142 monitored *in-situ* in Poland (and many other countries), which also hampers the interpretation of  
143 emission data.  
144

145 S3. Comparison of gridded emission maps

146

147

148

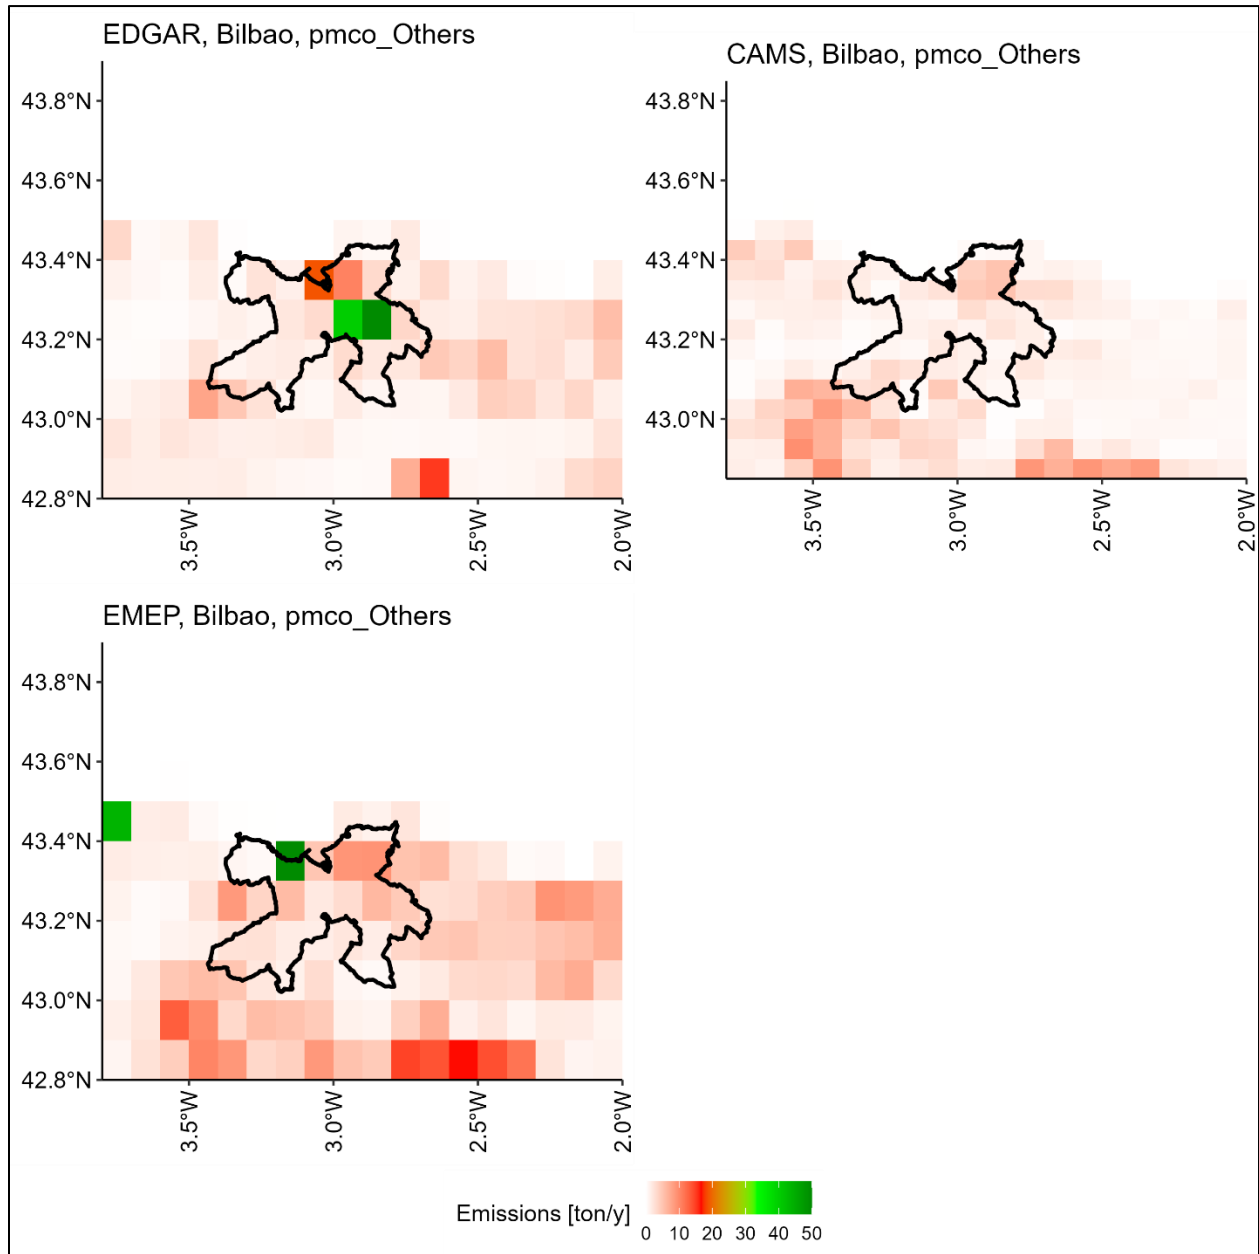

149  
150

Figure S7: PMco emissions for the other sector in Bilbao. The dark line indicates the shape of the functional urban area.



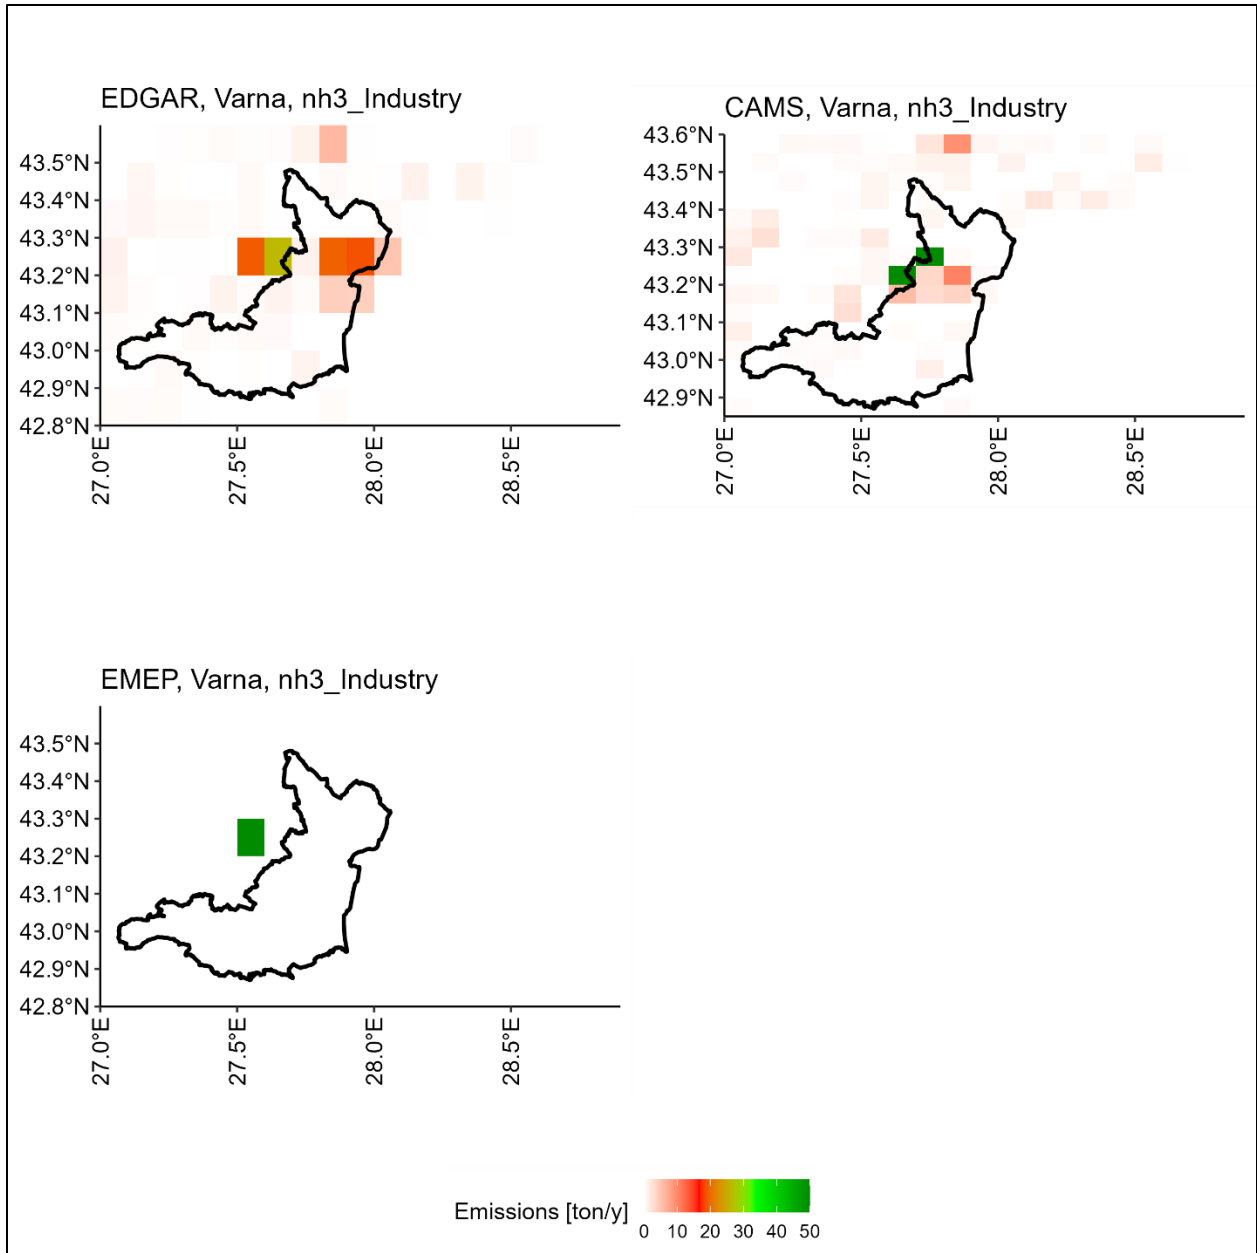

Figure S8: NH3 emissions for the industry for Varna. The dark line indicates the shape of the functional urban area.

151

152

153

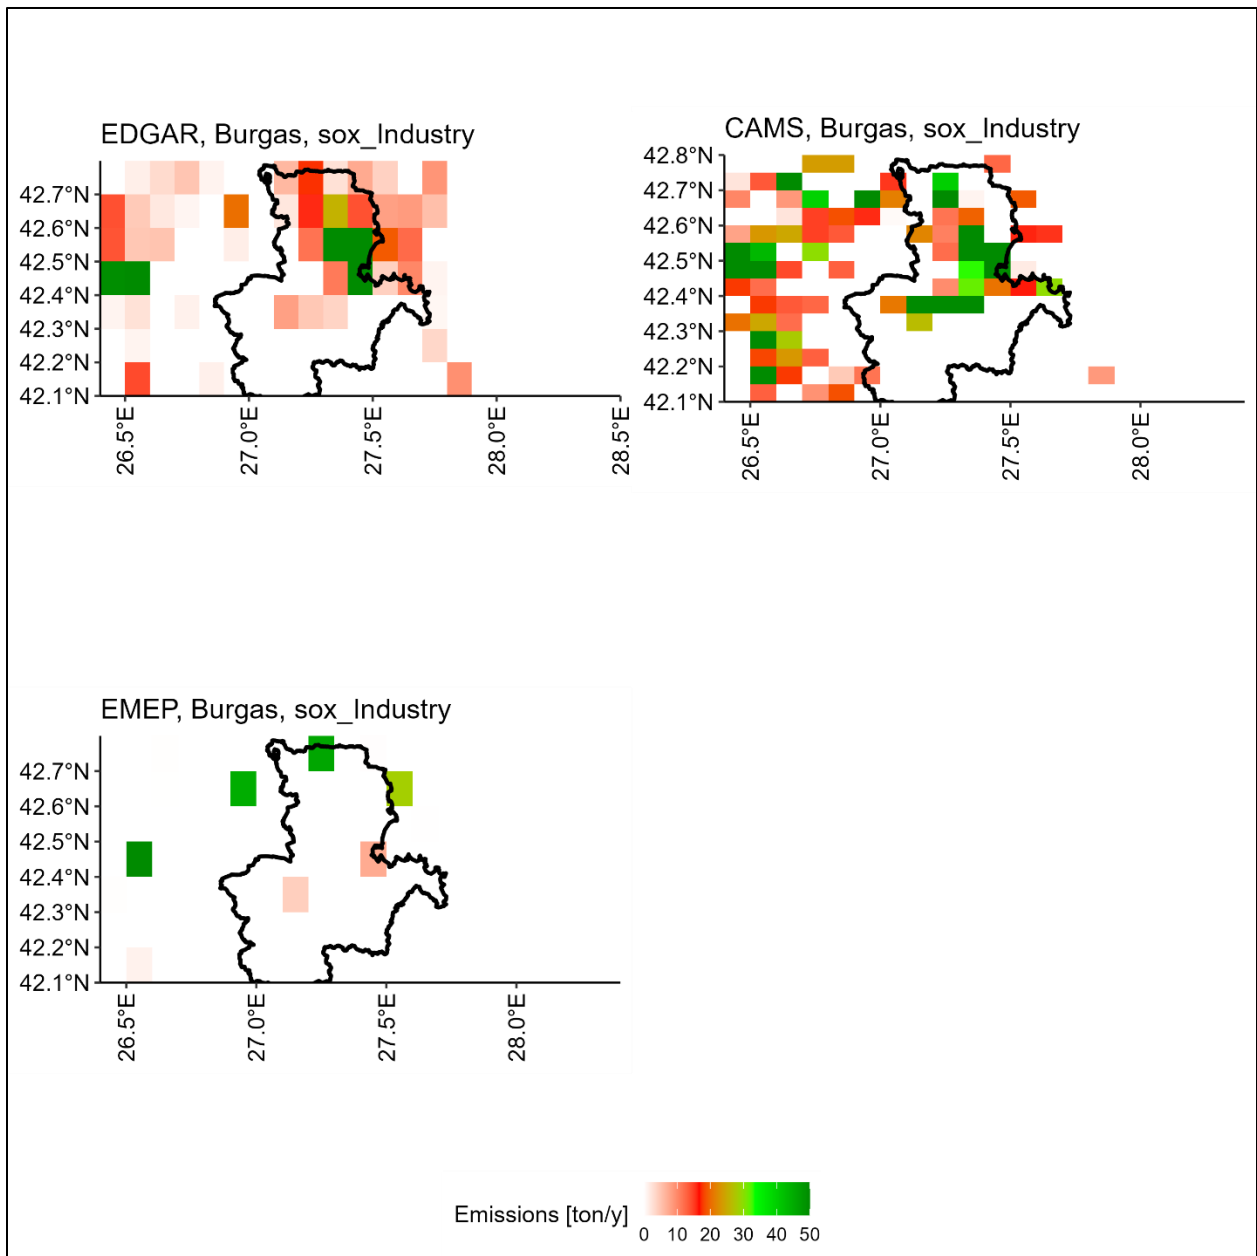

Figure S9: SO2 emissions for industry in Burgas (ES). The dark line indicates the shape of the functional urban area.

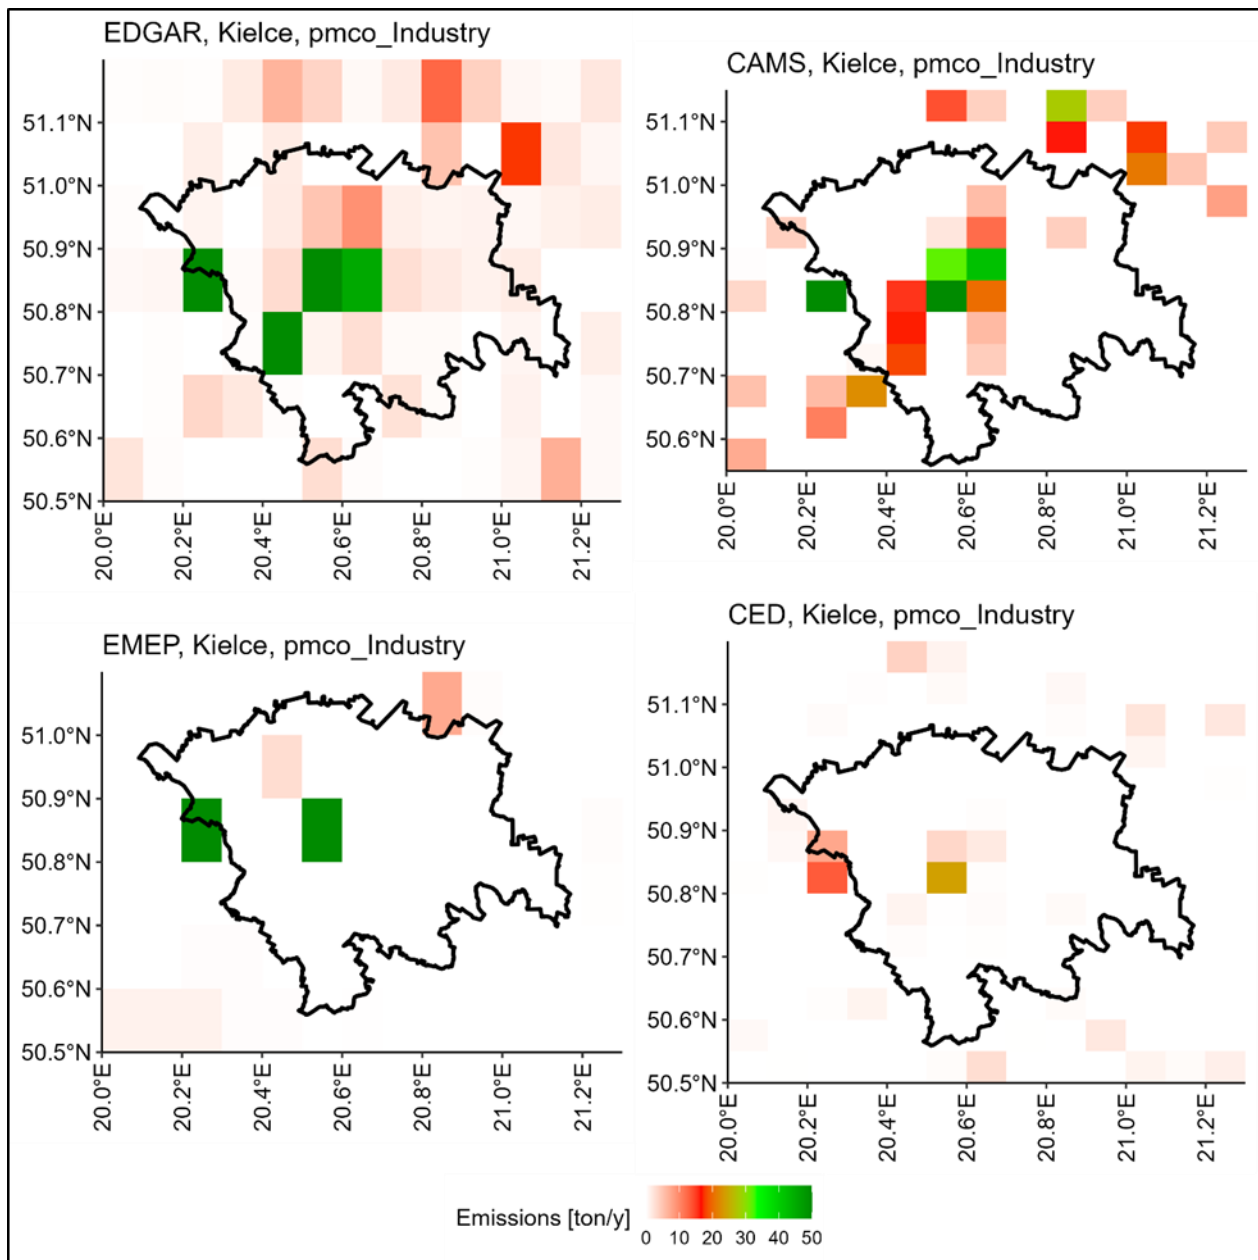

156

157

Figure S10: PMco emissions for the industry sector in Kielce. The dark line indicates the shape of the functional urban area.

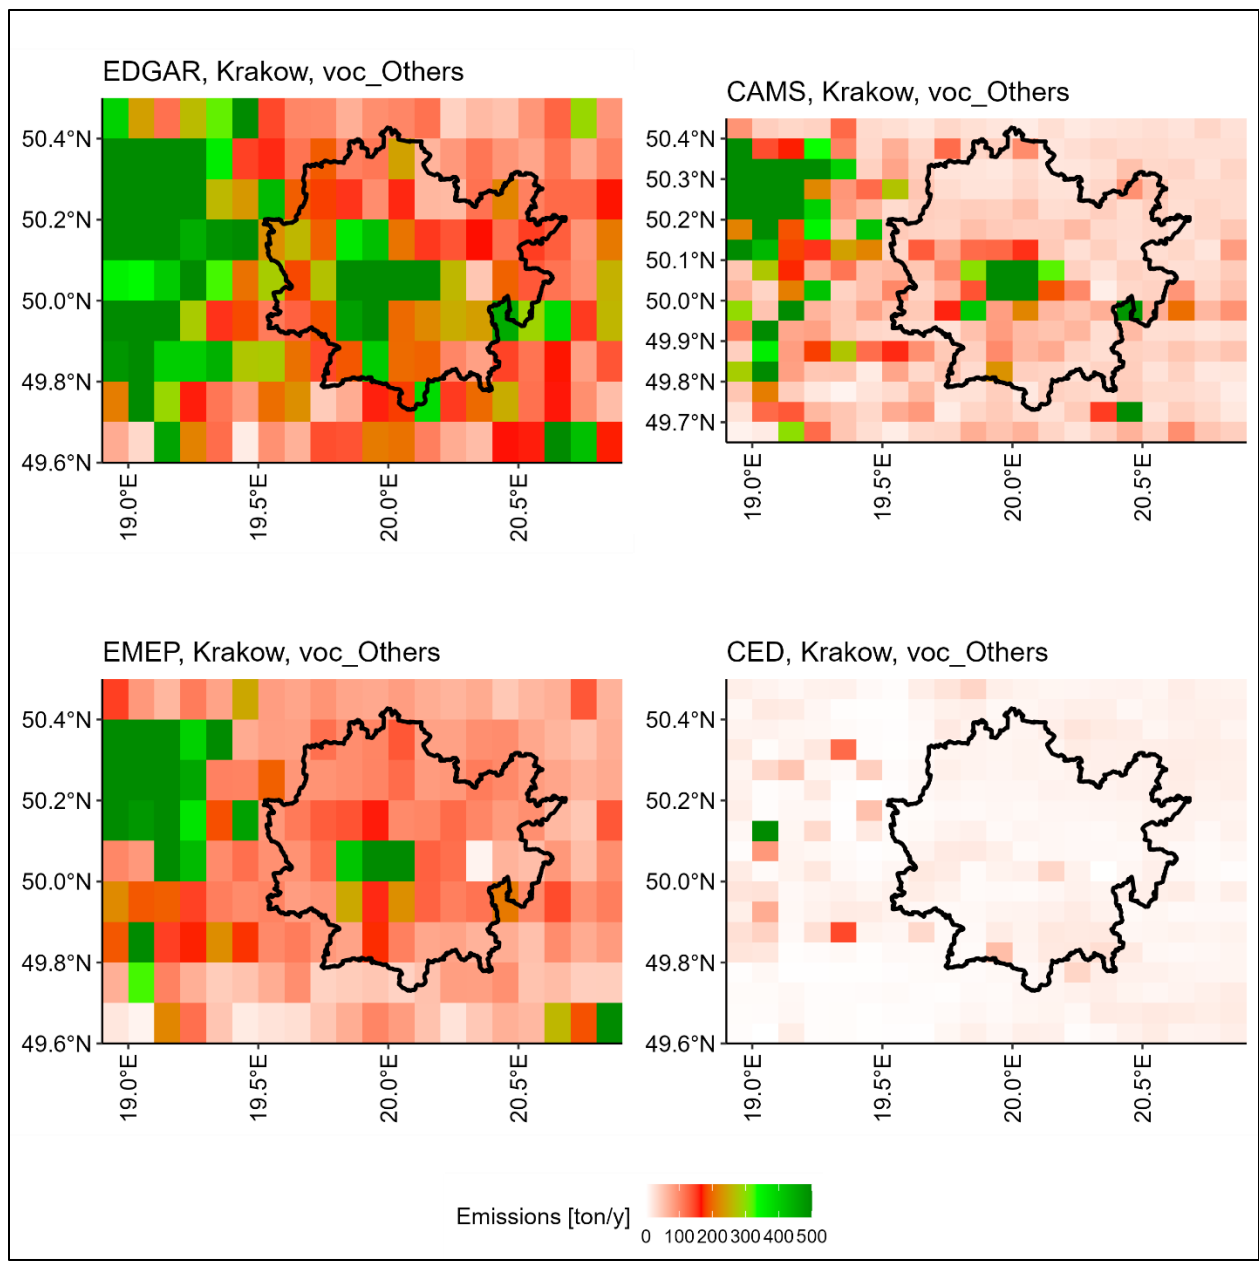

158  
 159  
 160

Figure S11: VOC emissions for the other sector in Krakow. The dark line indicates the shape of the functional urban area.

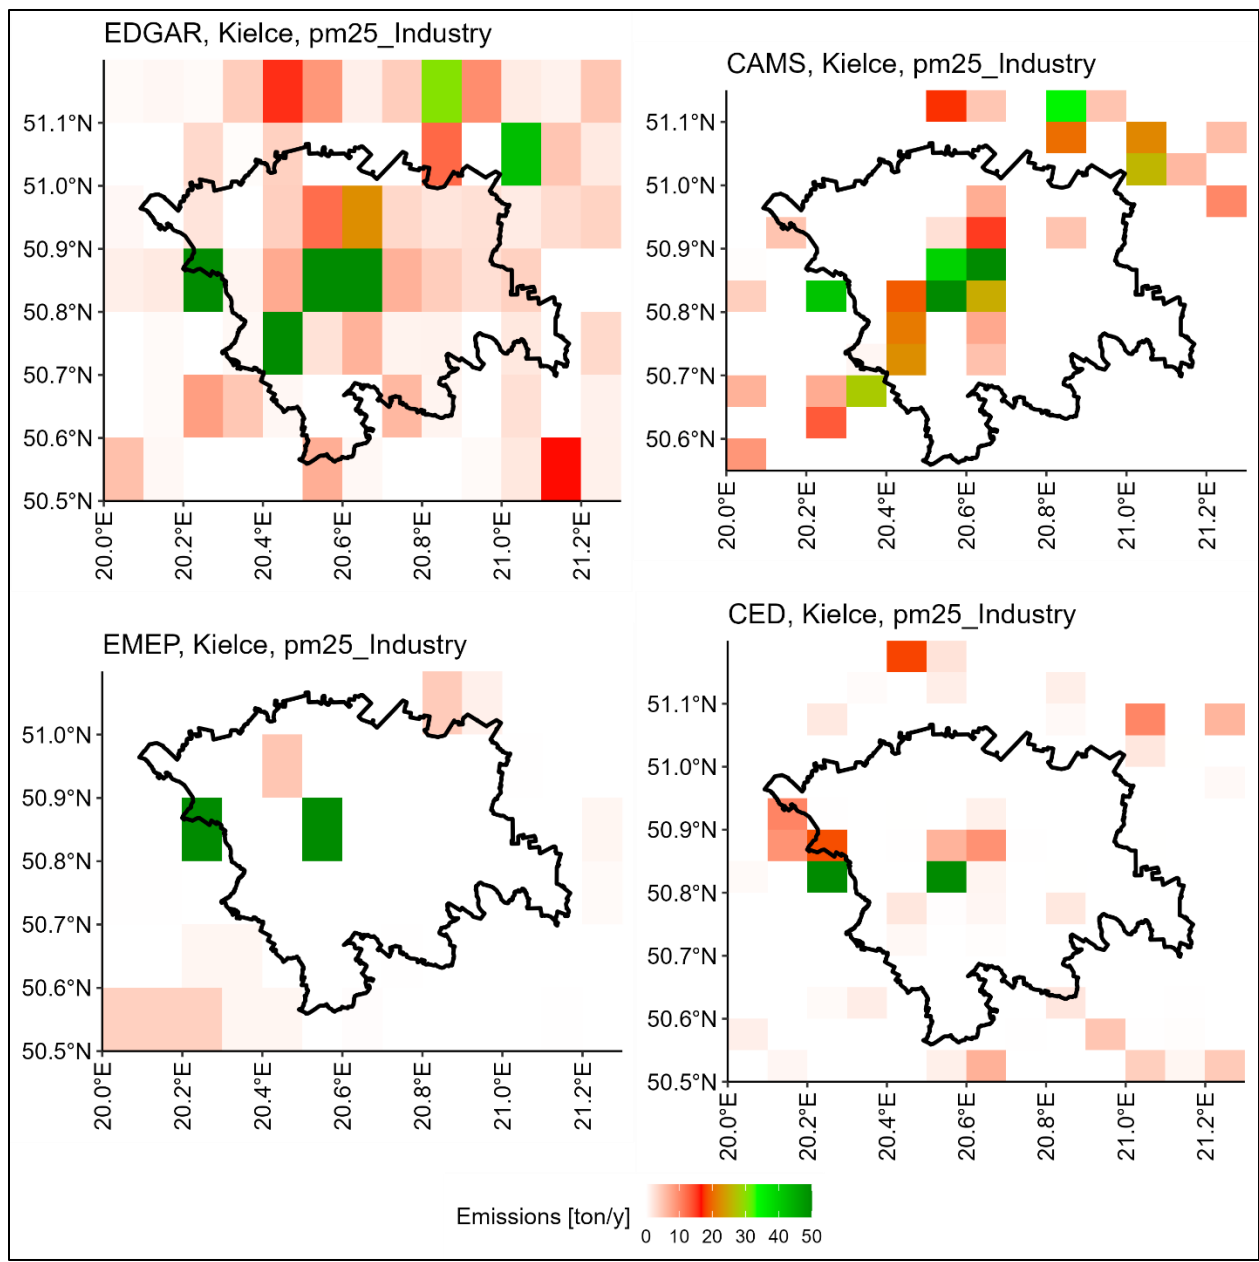

Figure S12: PM25 emissions from the industry sector in Kielce. The dark line indicates the shape of the functional urban area.

164

| <b>. GNFR</b>                                    | <b>SNAP</b>          | <b>CED</b>                                                      |
|--------------------------------------------------|----------------------|-----------------------------------------------------------------|
| A_PublicPower                                    | SNAP01               | Emission from NB named as SNAP1                                 |
| B_Industry                                       | SNAP03 and<br>SNAP04 | Emission from NB named as SNAP3 and<br>SNAP4                    |
| I_Offroad                                        | Part of<br>SNAP08    | Emission from agricultural tractors                             |
| F_RoadTransport                                  | SNAP07               | Emission from road transport                                    |
| C_OtherStationaryComb                            | SNAP02               | Emission from residential heating                               |
| D_Fugitive                                       | SNAP05               | Emission from heap and excavation and from<br>NB named as SNAP5 |
| E_Solvents                                       | SNAP06               | Emission from NB named as SNAP6                                 |
| K_AgriLivestock i L_AgriOther as<br>one GNFR K+L | SNAP10               | Emission from agriculture and livestock                         |
| J_Waste                                          | SNAP09               | Emission from landfills and from NB named<br>as SNAP5           |

165

Table S1: Translation from SNAP to GNFR applied in CED

166

167

|                | NMVOC                 |                        | NH3    |        | NOx                |                    | PM10                 |                      | PM25                 |                      | SO2                  |                      |
|----------------|-----------------------|------------------------|--------|--------|--------------------|--------------------|----------------------|----------------------|----------------------|----------------------|----------------------|----------------------|
|                | CED                   | EMEP                   | CED    | EMEP   | CED                | EMEP               | CED                  | EMEP                 | CED                  | EMEP                 | CED                  | EMEP                 |
| <b>GNFR A</b>  | 0.28 <sup>1)</sup>    | 2.68 <sup>1)</sup>     | 0.13   | 0.00   | 115.91             | 135.09             | 8.27                 | 5.96                 | 5.60                 | 3.21                 | 126.29 <sup>1)</sup> | 193.17 <sup>1)</sup> |
| <b>GNFR B</b>  | 17.76 <sup>2)</sup>   | 107.75 <sup>2)</sup>   | 5.98   | 4.25   | 69.30              | 74.70              | 12.06 <sup>2)</sup>  | 59.99 <sup>2)</sup>  | 8.89                 | 34.69                | 45.23 <sup>2)</sup>  | 107.83 <sup>2)</sup> |
| <b>GNFR C</b>  | 201.71                | 101.83                 | -      | 8.31   | 50.55              | 73.69              | 190.66 <sup>5)</sup> | 88.51 <sup>5)</sup>  | 187.02 <sup>5)</sup> | 59.12 <sup>5)</sup>  | 113.10               | 115.26               |
| <b>GNFR D</b>  | 1.50 <sup>3)</sup>    | 79.17 <sup>3)</sup>    | -      | 0.06   | 0.32 <sup>3)</sup> | 3.58 <sup>3)</sup> | 19.44                | 9.58                 | 4.81                 | 1.64                 | 0.16 <sup>3)</sup>   | 7.52 <sup>3)</sup>   |
| <b>GNFR E</b>  | 13.98 <sup>3,4)</sup> | 164.11 <sup>3,4)</sup> | 0.14   | 0.15   | 0.00               | 0.06               | 0.02 <sup>3)</sup>   | 0.93 <sup>3)</sup>   | 0.021 <sup>1)</sup>  | 0.93 <sup>1)</sup>   | 0.00                 | 0.68                 |
| <b>GNFR F</b>  | 74.98                 | 75.52                  | 2.93   | 2.95   | 274.00             | 273.50             | 18.10                | 18.06                | 13.57                | 13.54                | 0.54                 | 0.58                 |
| <b>GNFR G</b>  | 0.00                  | 0.01                   | 0.00   | 0.05   | 0.00               | 4.03               | 0.00                 | 0.15                 | 0.00                 | 0.15                 | 0.00                 | 0.20                 |
| <b>GNFR H</b>  | 0.03                  | 0.08                   | 0.00   | 0.00   | 0.66               | 1.85               | 0.00                 | 0.01                 | 0.00                 | 0.01                 | 0.05                 | 0.15                 |
| <b>GNFR I</b>  | 3.30                  | 4.12                   | 0.02   | 0.02   | 35.56              | 46.01              | 1.48                 | 1.69                 | 1.47                 | 1.67                 | 0.05                 | 0.15                 |
| <b>GNFR J</b>  | 0.77 <sup>2,3)</sup>  | 6.31 <sup>2,3)</sup>   | 0.27   | 0.89   | 1.33               | 1.97               | 0.51 <sup>2,3)</sup> | 4.47 <sup>2,3)</sup> | 0.47 <sup>2,3)</sup> | 5.73 <sup>2,3)</sup> | 0.18                 | 0.26                 |
| <b>GNFR KL</b> | 105.97                | 105.96                 | 303.43 | 300.14 | 69.91              | 69.22              | 29.87                | 29.48                | 3.32                 | 3.29                 | 0.00                 | 0.01                 |
|                |                       |                        |        |        |                    |                    |                      |                      |                      |                      |                      |                      |
| <b>SUM</b>     | 420.27                | 647.53                 | 312.91 | 316.84 | 617.54             | 683.74             | 280.41               | 218.83               | 225.17               | 123.97               | 285.59               | 425.82               |

168

169

170 Table S2: Country totals for CED and EMEP data (biggest differences are underlined and commented below).

171 1) NB users are not obligated to report all pollutants (NMVOC can be omitted) in this sector. For EMEP reporting, the missing  
172 emission values are estimated using official emission factors (EMEP/EEA air pollutant emission), which depend on basic activity  
173 data (Tier 1 – fuel consumption)

174 2) Reports provided to NB are based on user-specific permits which specify the list of pollutants to be reported. In EMEP  
175 reports, emissions are calculated using official EMEP/EEA emission factors.

176 3) In the case of NB, some reports might be based (or supplemented with) on individual emission measurements resulting from  
177 user-specific industrial processes. Such in-situ data does not always align with EMEP reporting methodology, nor does it cover  
178 the same set of pollutants.

179 4) For some processes categorized into GNFR E, which are not fully addressed in CED, EMEP emissions are based on population  
180 (like domestic solvent use, including fungicide and dry cleaning).

181 5) PM10 and PM2.5 emissions from stationary combustion are much lower in EMEP, because the data used in this work do not  
182 yet include condensable emissions whereas CED does.
